# Supplementary material for: Strong effects of genetic and lifestyle factors on biomarker variation and use of personalized cutoffs
Source: PubMed Central journal article supplement (PMC4143927; doi:10.1038/ncomms5684), 2014-08-22
Supplement: ncomms5684-s1.pdf [file ncomms5684-s1.pdf]

## Supplementary Figures

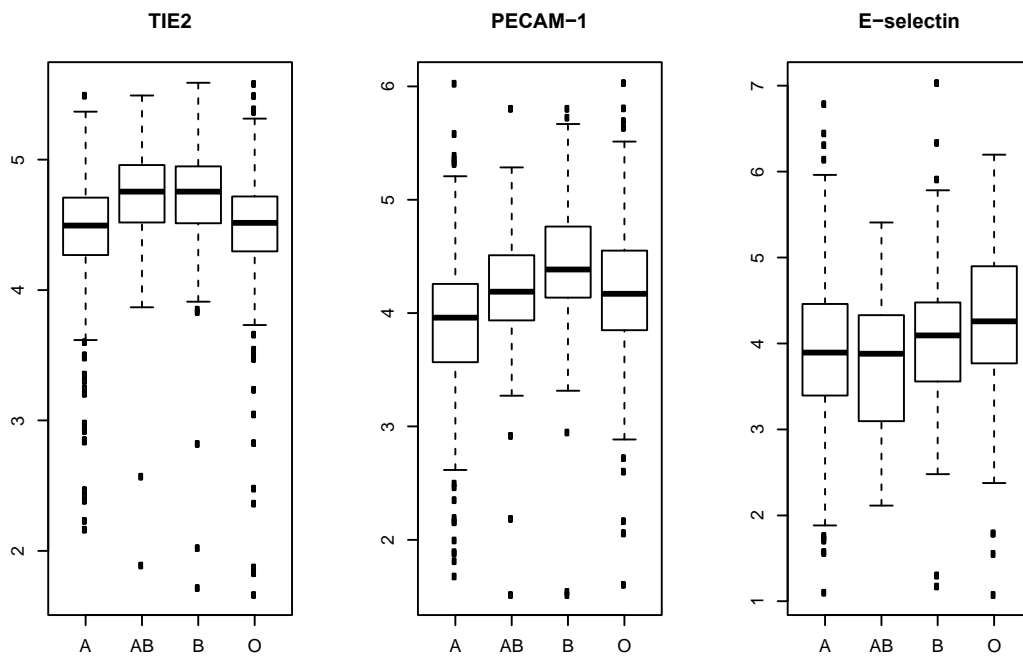

**Supplementary Figure 1.** Distribution of raw ddCq values based on blood group. Y-axes are raw ddCq values of protein level abundances split on A/AB/B and O blood group assignment. Thick horizontal lines depicts the median, the boxes depicts the first and third quartiles.

Spearman's Rho (squared) = 0.29

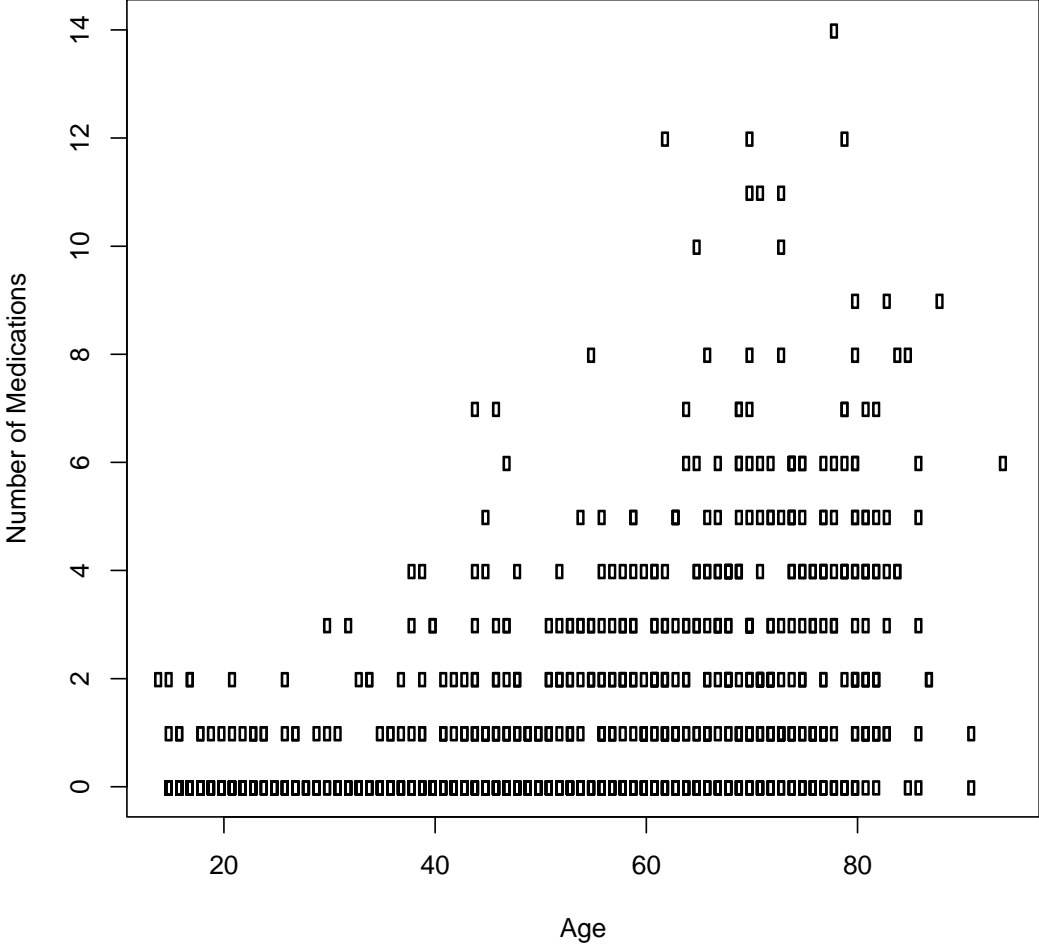

Supplementary Figure 2. Correlation between age and number of medications listed. Y-axis denotes the number of medications an individual is currently taking and the X-axis the age of the individuals.
